# Supplementary material
Source: PubMed Central journal article supplement (PMC10990519)
Supplement: ocad251_supplementary_data.pdf [file ocad251_supplementary_data.pdf]

**Supplementary Table S1.** Distribution of the extracted shared healthcare service-use trajectories for the case (BCS) and control (NBC) group, according to their length. The latter is defined by the total number of distinct common visited healthcare services, reflected in a trajectory.

| <b>Length (L)</b> | <b>Case (BCS)</b> | <b>Control (NBC)</b> |
|-------------------|-------------------|----------------------|
| 2                 | 75                | 85                   |
| 3                 | 300               | 413                  |
| 4                 | 1,076             | 1,309                |
| 5                 | 2,011             | 2,677                |
| 6                 | 1,518             | 2,460                |
| 7                 | 159               | 500                  |
| 8                 | 21                | 10                   |

**Supplementary Table S2.** Ten most frequent shared care trajectories, for all identified lengths  $L = 2-7$  (number of common distinct services), corresponding to the BCS (case) group. The total number of patients (*#pat*) that share each trajectory is also reported. The numerical visit codes correspond to the following services: 1: Family doctor, 2: Nursing Primary Care, 3: Other Primary Care, 4: Emergency Primary Care, 5: Outpatient Care, 6: Hospital Emergency, 7: Hospital Admission, 8: Laboratory, 9: Radiology, 10: Rehabilitation, 11: Psychology, according to Table 1.

| <i>L</i> = 2          |                       |                       | <i>L</i> = 3          |                       |                       |                       | <i>L</i> = 4          |                       |                       |                       |                       |             |
|-----------------------|-----------------------|-----------------------|-----------------------|-----------------------|-----------------------|-----------------------|-----------------------|-----------------------|-----------------------|-----------------------|-----------------------|-------------|
| <i>s</i> <sub>1</sub> | <i>s</i> <sub>2</sub> | <i>#pat</i>           | <i>s</i> <sub>1</sub> | <i>s</i> <sub>2</sub> | <i>s</i> <sub>3</sub> | <i>#pat</i>           | <i>s</i> <sub>1</sub> | <i>s</i> <sub>2</sub> | <i>s</i> <sub>3</sub> | <i>s</i> <sub>4</sub> | <i>#pat</i>           |             |
| 1                     | 2                     | 3,803                 | 1                     | 5                     | 6                     | 1,339                 | 1                     | 5                     | 2                     | 6                     | 514                   |             |
| 1                     | 5                     | 2,997                 | 1                     | 5                     | 2                     | 1,316                 | 1                     | 5                     | 9                     | 6                     | 500                   |             |
| 5                     | 2                     | 2,670                 | 1                     | 2                     | 6                     | 1,311                 | 1                     | 5                     | 9                     | 8                     | 417                   |             |
| 1                     | 4                     | 2,538                 | 1                     | 2                     | 4                     | 1,246                 | 1                     | 5                     | 2                     | 4                     | 412                   |             |
| 1                     | 6                     | 2,491                 | 1                     | 5                     | 4                     | 1,180                 | 1                     | 5                     | 6                     | 7                     | 405                   |             |
| 1                     | 8                     | 2,203                 | 1                     | 5                     | 7                     | 1,091                 | 1                     | 5                     | 2                     | 7                     | 395                   |             |
| 2                     | 4                     | 2,150                 | 1                     | 5                     | 8                     | 1,024                 | 1                     | 9                     | 6                     | 7                     | 366                   |             |
| 1                     | 9                     | 2,099                 | 1                     | 2                     | 7                     | 1,016                 | 2                     | 1                     | 5                     | 6                     | 357                   |             |
| 1                     | 7                     | 1,993                 | 5                     | 1                     | 2                     | 929                   | 1                     | 5                     | 4                     | 6                     | 356                   |             |
| 2                     | 1                     | 1,905                 | 1                     | 5                     | 9                     | 926                   | 1                     | 5                     | 2                     | 3                     | 356                   |             |
| <i>L</i> = 5          |                       |                       |                       |                       |                       | <i>L</i> = 6          |                       |                       |                       |                       |                       |             |
| <i>s</i> <sub>1</sub> | <i>s</i> <sub>2</sub> | <i>s</i> <sub>3</sub> | <i>s</i> <sub>4</sub> | <i>s</i> <sub>5</sub> | <i>#pat</i>           | <i>s</i> <sub>1</sub> | <i>s</i> <sub>2</sub> | <i>s</i> <sub>3</sub> | <i>s</i> <sub>4</sub> | <i>s</i> <sub>5</sub> | <i>s</i> <sub>6</sub> | <i>#pat</i> |
| 1                     | 5                     | 9                     | 6                     | 7                     | 168                   | 2                     | 1                     | 5                     | 9                     | 6                     | 7                     | 46          |
| 1                     | 5                     | 2                     | 6                     | 7                     | 134                   | 1                     | 2                     | 5                     | 9                     | 6                     | 7                     | 41          |
| 1                     | 5                     | 9                     | 8                     | 6                     | 131                   | 1                     | 5                     | 9                     | 8                     | 6                     | 7                     | 40          |
| 1                     | 5                     | 9                     | 8                     | 7                     | 126                   | 1                     | 5                     | 9                     | 2                     | 8                     | 6                     | 37          |
| 2                     | 1                     | 5                     | 9                     | 6                     | 123                   | 1                     | 5                     | 9                     | 6                     | 4                     | 7                     | 35          |
| 1                     | 5                     | 2                     | 4                     | 6                     | 122                   | 1                     | 5                     | 9                     | 6                     | 8                     | 7                     | 34          |
| 1                     | 2                     | 9                     | 6                     | 7                     | 121                   | 2                     | 1                     | 8                     | 9                     | 6                     | 7                     | 34          |
| 1                     | 5                     | 9                     | 2                     | 8                     | 120                   | 2                     | 1                     | 5                     | 9                     | 8                     | 7                     | 34          |
| 1                     | 5                     | 2                     | 7                     | 6                     | 119                   | 1                     | 2                     | 8                     | 9                     | 6                     | 7                     | 32          |
| 1                     | 5                     | 9                     | 6                     | 4                     | 117                   | 1                     | 5                     | 2                     | 9                     | 6                     | 7                     | 32          |
| <i>L</i> = 7          |                       |                       |                       |                       |                       |                       |                       |                       |                       |                       |                       |             |
| <i>s</i> <sub>1</sub> | <i>s</i> <sub>2</sub> | <i>s</i> <sub>3</sub> | <i>s</i> <sub>4</sub> | <i>s</i> <sub>5</sub> | <i>s</i> <sub>6</sub> | <i>s</i> <sub>7</sub> | <i>#pat</i>           |                       |                       |                       |                       |             |
| 1                     | 5                     | 2                     | 9                     | 6                     | 4                     | 7                     | 12                    |                       |                       |                       |                       |             |
| 1                     | 2                     | 5                     | 9                     | 6                     | 4                     | 7                     | 10                    |                       |                       |                       |                       |             |
| 1                     | 5                     | 9                     | 2                     | 8                     | 7                     | 6                     | 10                    |                       |                       |                       |                       |             |
| 2                     | 1                     | 5                     | 9                     | 6                     | 8                     | 7                     | 10                    |                       |                       |                       |                       |             |
| 2                     | 1                     | 5                     | 9                     | 8                     | 6                     | 7                     | 10                    |                       |                       |                       |                       |             |
| 1                     | 2                     | 5                     | 9                     | 8                     | 6                     | 7                     | 9                     |                       |                       |                       |                       |             |
| 2                     | 1                     | 9                     | 5                     | 8                     | 6                     | 7                     | 9                     |                       |                       |                       |                       |             |
| 2                     | 1                     | 8                     | 5                     | 9                     | 6                     | 7                     | 9                     |                       |                       |                       |                       |             |
| 2                     | 1                     | 5                     | 9                     | 6                     | 7                     | 3                     | 8                     |                       |                       |                       |                       |             |
| 1                     | 5                     | 9                     | 2                     | 8                     | 6                     | 7                     | 8                     |                       |                       |                       |                       |             |
| 1                     | 5                     | 2                     | 9                     | 6                     | 4                     | 7                     | 12                    |                       |                       |                       |                       |             |

**Supplementary Table S3.** Ten most frequent shared care trajectories, for lengths  $L = 2$ -7 (number of common distinct services), corresponding to the NBC (control) group. The total number of patients ( $\#pat$ ) that share each trajectory is also reported. The numerical visit codes correspond to the following services: 1: Family doctor, 2: Nursing Primary Care, 3: Other Primary Care, 4: Emergency Primary Care, 5: Outpatient Care, 6: Hospital Emergency, 7: Hospital Admission, 8: Laboratory, 9: Radiology, 10: Rehabilitation, 11: Psychology, according to Table 1.

| $L = 2$ |       |         | $L = 3$ |       |         |         | $L = 4$ |       |       |       |         |         |
|---------|-------|---------|---------|-------|---------|---------|---------|-------|-------|-------|---------|---------|
| $s_1$   | $s_2$ | $\#pat$ | $s_1$   | $s_2$ | $s_3$   | $\#pat$ | $s_1$   | $s_2$ | $s_3$ | $s_4$ | $\#pat$ |         |
| 1       | 2     | 7,618   | 1       | 2     | 4       | 2,482   | 1       | 8     | 9     | 6     | 1,045   |         |
| 1       | 5     | 5,830   | 1       | 5     | 6       | 2,299   | 1       | 5     | 9     | 6     | 803     |         |
| 1       | 4     | 5,043   | 1       | 2     | 6       | 2,233   | 1       | 2     | 9     | 6     | 781     |         |
| 1       | 8     | 4,610   | 1       | 9     | 6       | 2,054   | 2       | 1     | 5     | 6     | 693     |         |
| 1       | 6     | 4,249   | 1       | 2     | 5       | 2,033   | 1       | 5     | 2     | 6     | 692     |         |
| 2       | 4     | 4,210   | 1       | 8     | 9       | 1,999   | 1       | 2     | 5     | 6     | 678     |         |
| 2       | 5     | 4,065   | 1       | 5     | 4       | 1,978   | 2       | 1     | 9     | 6     | 633     |         |
| 1       | 9     | 3,862   | 1       | 5     | 2       | 1,869   | 1       | 2     | 8     | 9     | 587     |         |
| 2       | 1     | 3,650   | 1       | 8     | 6       | 1,754   | 1       | 2     | 5     | 4     | 585     |         |
| 1       | 3     | 3,440   | 1       | 2     | 3       | 1,712   | 1       | 9     | 6     | 7     | 585     |         |
| $L = 5$ |       |         |         |       |         | $L = 6$ |         |       |       |       |         |         |
| $s_1$   | $s_2$ | $s_3$   | $s_4$   | $s_5$ | $\#pat$ | $s_1$   | $s_2$   | $s_3$ | $s_4$ | $s_5$ | $s_6$   | $\#pat$ |
| 2       | 1     | 8       | 9       | 6     | 321     | 2       | 1       | 8     | 9     | 6     | 7       | 94      |
| 1       | 2     | 8       | 9       | 6     | 309     | 1       | 2       | 8     | 9     | 6     | 7       | 80      |
| 1       | 8     | 9       | 6       | 7     | 272     | 2       | 1       | 5     | 8     | 9     | 6       | 76      |
| 1       | 8     | 5       | 9       | 6     | 265     | 2       | 1       | 5     | 9     | 6     | 7       | 71      |
| 1       | 5     | 8       | 9       | 6     | 235     | 1       | 2       | 8     | 5     | 9     | 6       | 70      |
| 2       | 1     | 5       | 9       | 6     | 231     | 1       | 2       | 8     | 9     | 6     | 4       | 70      |
| 1       | 8     | 9       | 6       | 4     | 231     | 2       | 1       | 8     | 9     | 6     | 4       | 69      |
| 1       | 8     | 2       | 9       | 6     | 221     | 2       | 1       | 8     | 5     | 9     | 6       | 68      |
| 1       | 2     | 9       | 6       | 7     | 218     | 1       | 2       | 8     | 9     | 6     | 3       | 66      |
| 1       | 5     | 9       | 6       | 7     | 209     | 1       | 5       | 8     | 9     | 6     | 3       | 66      |
| $L = 7$ |       |         |         |       |         |         |         |       |       |       |         |         |
| $s_1$   | $s_2$ | $s_3$   | $s_4$   | $s_5$ | $s_6$   | $s_7$   | $\#pat$ |       |       |       |         |         |
| 2       | 1     | 5       | 8       | 9     | 6       | 7       | 26      |       |       |       |         |         |
| 2       | 1     | 5       | 8       | 9     | 6       | 3       | 20      |       |       |       |         |         |
| 2       | 1     | 5       | 8       | 6     | 7       | 3       | 20      |       |       |       |         |         |
| 1       | 2     | 8       | 9       | 6     | 4       | 7       | 19      |       |       |       |         |         |
| 2       | 1     | 5       | 8       | 9     | 6       | 4       | 18      |       |       |       |         |         |
| 2       | 1     | 5       | 9       | 6     | 7       | 3       | 18      |       |       |       |         |         |
| 2       | 1     | 5       | 8       | 9     | 7       | 3       | 17      |       |       |       |         |         |
| 1       | 2     | 8       | 9       | 7     | 6       | 3       | 17      |       |       |       |         |         |
| 2       | 1     | 8       | 9       | 6     | 4       | 7       | 17      |       |       |       |         |         |
| 1       | 5     | 2       | 8       | 9     | 6       | 3       | 16      |       |       |       |         |         |
| 2       | 1     | 5       | 8       | 9     | 6       | 7       | 26      |       |       |       |         |         |

**Supplementary Table S4.** Example of an extracted cluster composed of seven individual care trajectories, after applying the DTW-based unsupervised clustering algorithm to the BCS group. The total number of patients (*#pat*) that share each trajectory is also reported. The numerical visit codes correspond to the following services: 1: Family doctor, 2: Nursing Primary Care, 5: Outpatient Care, 6: Hospital Emergency, 7: Hospital Admission, 8: Laboratory, 9: Radiology, according to Table 1. The basic pattern reflected in the cluster is shown in bold (**5 → 9 → 6**). The last trajectory (in grey) was finally filtered out as it did not fulfil the requirement of at least 60 individuals per shared trajectory.

| <b>Shared care trajectory</b> | <i>#pat</i> |
|-------------------------------|-------------|
| <b>5 → 9 → 6</b>              | 598         |
| 1 → 5 → 9 → 6                 | 803         |
| 8 → 5 → 9 → 6                 | 315         |
| 5 → 9 → 6 → 7                 | 171         |
| 1 → 2 → 5 → 9 → 6             | 202         |
| 1 → 5 → 9 → 6 → 7             | 209         |
| 1 → 5 → 9 → 8 → 6 → 7         | 40          |

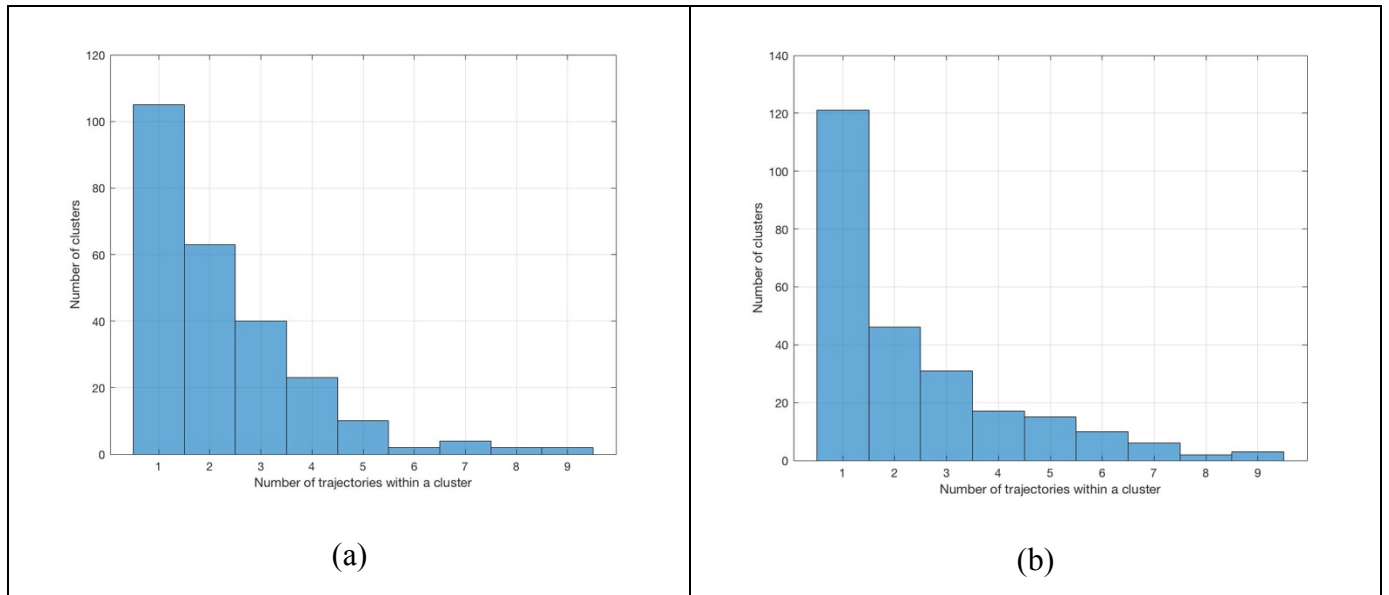

**Supplementary Figure S1.** Distribution of the number of extracted clusters based on the number of individual shared service-use trajectories of which they are composed, for the (a) case (BCS) and (b) control (NBC (control) group. A minimum of (a) 60 and (b) 120 individuals (corresponding to ~1% of the total number of patients in each group respectively) was required to share each trajectory in order to be assigned to a cluster.
